# Supplementary material for: Prevalence and Correlates of Long COVID Symptoms Among US Adults
Source: PubMed Central journal article supplement (PMC9614581; doi:10.1001/jamanetworkopen.2022.38804), 2022-10-27

## Supplementary Online Content

Perlis RH, Santillana M, Ognyanova K, et al. Prevalence and correlates of long COVID symptoms among US adults. *JAMA Netw Open*. 2022;5(10):e2238804. doi:10.1001/jamanetworkopen.2022.38804

**eTable 1.** Point Prevalences of Long COVID-19 Among Individuals Testing Positive for COVID-19 by Antigen Test or PCR, and Among All Surveyed US Adults, Weighted to Reflect US Adult Population

**eFigure 1.** Logistic Regression Model for Development of Long COVID-19 Among Individuals Testing Positive for COVID-19 by Antigen Test or PCR, With Age by Decade

**eTable 2.** Long COVID-19 Symptom Frequencies by Predominant Variant at Time of Initial Illness

**eTable 3.** Characteristics of Individuals Who Tested Positive for COVID-19 by Antigen Test or PCR at Least Two Months Prior to Survey Date, Who Did or Did Not Experience Long COVID-19 Symptoms by More Stringent Definition

**eFigure 2.** Logistic Regression Model for Development of Long COVID-19 Among Individuals Testing Positive for COVID-19 by Antigen Test or PCR, With Age by Decade, Limited to Individuals With Index Infection January 2021 or Later

**eFigure 3.** Logistic Regression Model for Development of More Stringently Defined Long COVID-19 Among Individuals Testing Positive for COVID-19 by Antigen Test or PCR

**eFigure 4.** Logistic Regression Model for Development of Long COVID-19 by More Stringent Definition Among Individuals Testing Positive for COVID-19 by Antigen Test or PCR, Including Predominant Variant and Vaccination Status

This supplementary material has been provided by the authors to give readers additional information about their work.

**eTable 1.** Point Prevalences of Long COVID-19 Among Individuals Testing Positive for COVID-19 by Antigen Test or PCR, and Among All Surveyed US Adults, Weighted to Reflect US Adult Population

|                           | Proportion of <i>COVID positive</i> US adults |          |       | Proportion of all US adults |          |      |
|---------------------------|-----------------------------------------------|----------|-------|-----------------------------|----------|------|
|                           | estimate                                      | [ 95% CI | ]     | estimate                    | [ 95% CI | ]    |
| <b>Overall</b>            | 13.9%                                         | 13.3%    | 14.6% | 1.7%                        | 1.6%     | 1.7% |
| <b>Gender</b>             |                                               |          |       |                             |          |      |
| Male                      | 10.2%                                         | 9.3%     | 11.1% | 1.3%                        | 1.2%     | 1.4% |
| Female                    | 17.9%                                         | 17.0%    | 18.8% | 2.0%                        | 1.9%     | 2.1% |
| <b>Age</b>                |                                               |          |       |                             |          |      |
| 18-29                     | 10.2%                                         | 8.3%     | 12.4% | 1.4%                        | 1.1%     | 1.7% |
| 30-39                     | 10.8%                                         | 9.8%     | 12.1% | 1.6%                        | 1.4%     | 1.8% |
| 40-49                     | 12.6%                                         | 11.6%    | 13.6% | 1.8%                        | 1.7%     | 1.9% |
| 50-59                     | 20.2%                                         | 18.2%    | 22.4% | 2.2%                        | 2.0%     | 2.5% |
| 60-69                     | 18.3%                                         | 16.1%    | 20.7% | 1.5%                        | 1.3%     | 1.7% |
| 70+                       | 14.3%                                         | 11.6%    | 17.4% | 1.0%                        | 0.8%     | 1.2% |
| <b>Race and Ethnicity</b> |                                               |          |       |                             |          |      |
| Asian                     | 7.5%                                          | 5.7%     | 10.0% | 0.7%                        | 0.5%     | 0.9% |
| Black                     | 9.7%                                          | 8.2%     | 11.5% | 1.0%                        | 0.9%     | 1.2% |
| Hispanic                  | 12.6%                                         | 10.8%    | 14.5% | 2.0%                        | 1.7%     | 2.4% |
| White                     | 15.5%                                         | 14.7%    | 16.3% | 1.8%                        | 1.7%     | 1.9% |
| Other                     | 15.3%                                         | 12.0%    | 19.2% | 1.7%                        | 1.3%     | 2.1% |

**eFigure 1.** Logistic Regression Model for Development of Long COVID-19 Among Individuals Testing Positive for COVID-19 by Antigen Test or PCR, With Age by Decade

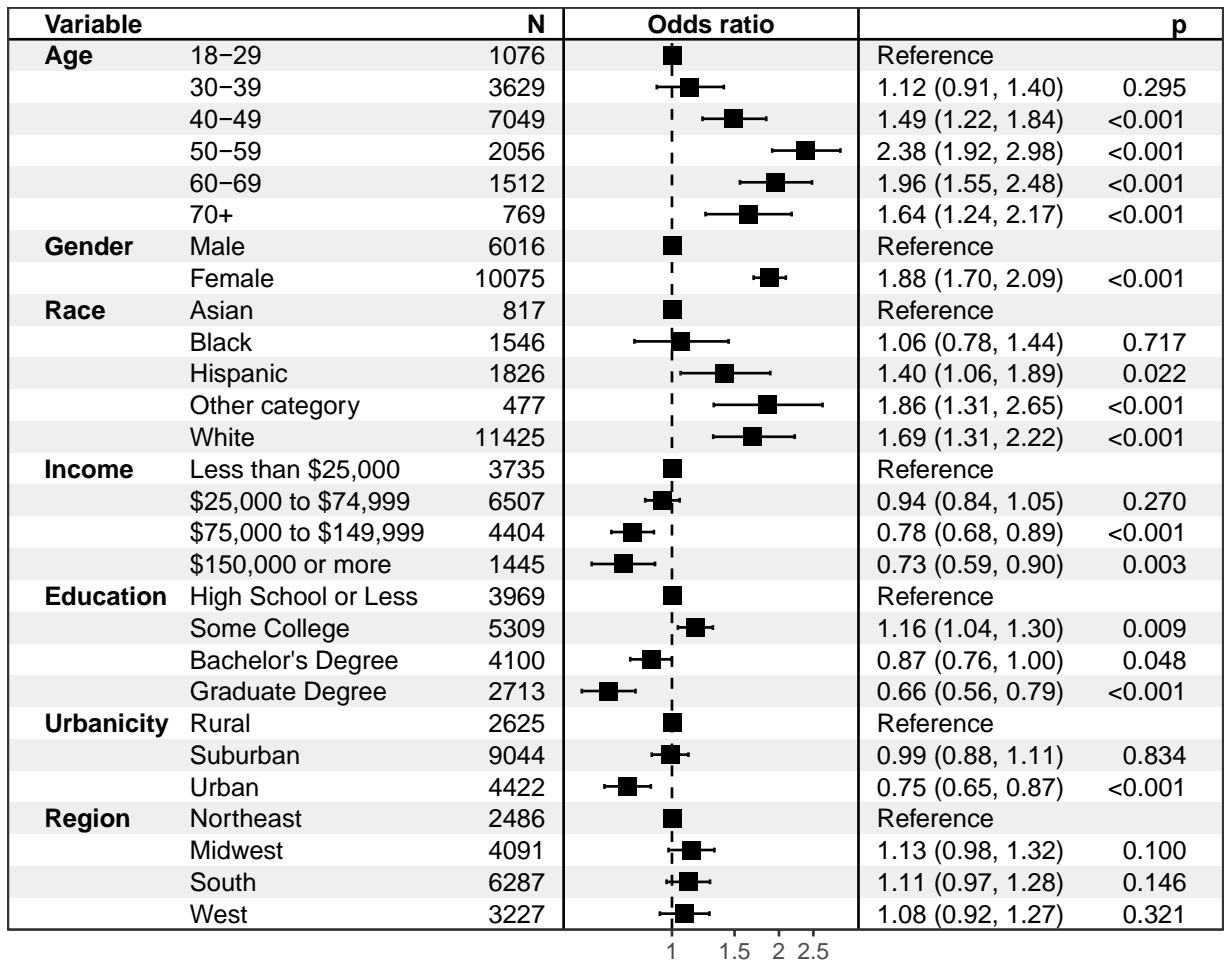

**eTable 2.** Long COVID-19 Symptom Frequencies by Predominant Variant at Time of Initial Illness

*Supplemental Table. Long COVID symptoms, by predominant variant*

|                                   | alpha<br>(N=147) | ancestral<br>(N=1344) | delta<br>(N=416) | epsilon<br>(N=206) | omicron<br>(N=246) | Total<br>(N=2359) | p value |
|-----------------------------------|------------------|-----------------------|------------------|--------------------|--------------------|-------------------|---------|
| <b>Shortness of breath</b>        | 58<br>(39.5%)    | 554<br>(41.2%)        | 149<br>(35.8%)   | 74<br>(35.9%)      | 102<br>(41.5%)     | 937<br>(39.7%)    | 0.243   |
| <b>Exercise intolerance</b>       | 37<br>(25.2%)    | 387<br>(28.8%)        | 129<br>(31.0%)   | 60<br>(29.1%)      | 72<br>(29.3%)      | 685<br>(29.0%)    | 0.755   |
| <b>Fatigue</b>                    | 78<br>(53.1%)    | 708<br>(52.7%)        | 214<br>(51.4%)   | 92<br>(44.7%)      | 140<br>(56.9%)     | 1232<br>(52.2%)   | 0.128   |
| <b>Headache</b>                   | 49<br>(33.3%)    | 457<br>(34.0%)        | 131<br>(31.5%)   | 68<br>(33.0%)      | 88<br>(35.8%)      | 793<br>(33.6%)    | 0.829   |
| <b>Loss of smell</b>              | 59<br>(40.1%)    | 590<br>(43.9%)        | 210<br>(50.5%)   | 89<br>(43.2%)      | 83<br>(33.7%)      | 1031<br>(43.7%)   | < 0.001 |
| <b>Brain fog</b>                  | 51<br>(34.7%)    | 548<br>(40.8%)        | 165<br>(39.7%)   | 85<br>(41.3%)      | 103<br>(41.9%)     | 952<br>(40.4%)    | 0.655   |
| <b>Poor memory</b>                | 33<br>(22.4%)    | 381<br>(28.3%)        | 114<br>(27.4%)   | 66<br>(32.0%)      | 70<br>(28.5%)      | 664<br>(28.1%)    | 0.399   |
| <b>(Either cognitive symptom)</b> | 58<br>(39.5%)    | 623<br>(46.4%)        | 184<br>(44.2%)   | 97<br>(47.1%)      | 117<br>(47.6%)     | 1079<br>(45.7%)   | 0.493   |
| <b>Dizziness</b>                  | 33<br>(22.4%)    | 269<br>(20.0%)        | 79<br>(19.0%)    | 44<br>(21.4%)      | 60<br>(24.4%)      | 485<br>(20.6%)    | 0.480   |
| <b>Depressed mood</b>             | 34<br>(23.1%)    | 319<br>(23.7%)        | 94<br>(22.6%)    | 49<br>(23.8%)      | 54<br>(22.0%)      | 550<br>(23.3%)    | 0.970   |
| <b>Anxious mood</b>               | 35<br>(23.8%)    | 400<br>(29.8%)        | 120<br>(28.8%)   | 62<br>(30.1%)      | 61<br>(24.8%)      | 678<br>(28.7%)    | 0.344   |
| <b>Sleep disruption</b>           | 40<br>(27.2%)    | 409<br>(30.4%)        | 125<br>(30.0%)   | 59<br>(28.6%)      | 75<br>(30.5%)      | 708<br>(30.0%)    | 0.928   |
|                                   |                  |                       |                  |                    |                    |                   | 0.805   |
| <b>Mean (SD) symptom count</b>    | 3.449<br>(2.758) | 3.737<br>(2.755)      | 3.678<br>(2.708) | 3.631<br>(2.859)   | 3.691<br>(2.627)   | 3.694<br>(2.742)  |         |

**eTable 3.** Characteristics of Individuals Who Tested Positive for COVID-19 by Antigen Test or PCR at Least Two Months Prior to Survey Date, Who Did or Did Not Experience Long COVID-19 Symptoms by More Stringent Definition

|                       | No Long COVID<br>(N=14086) | Long COVID<br>(N=2005) | Total<br>(N=16091) | p value |
|-----------------------|----------------------------|------------------------|--------------------|---------|
| Gender                |                            |                        |                    | < 0.001 |
| Male                  | 5528 (39.2%)               | 488 (24.3%)            | 6016 (37.4%)       |         |
| Female                | 8558 (60.8%)               | 1517 (75.7%)           | 10075 (62.6%)      |         |
| Age (years)           |                            |                        |                    | < 0.001 |
| Mean (SD)             | 39.99 (15.19)              | 44.17 (15.07)          | 40.51 (15.23)      |         |
| Education             |                            |                        |                    | < 0.001 |
| High School or Less   | 3440 (24.4%)               | 529 (26.4%)            | 3969 (24.7%)       |         |
| Some College          | 4480 (31.8%)               | 829 (41.3%)            | 5309 (33.0%)       |         |
| Bachelor's Degree     | 3656 (26.0%)               | 444 (22.1%)            | 4100 (25.5%)       |         |
| Graduate Degree       | 2510 (17.8%)               | 203 (10.1%)            | 2713 (16.9%)       |         |
| Income                |                            |                        |                    | < 0.001 |
| Less than \$25,000    | 3174 (22.5%)               | 561 (28.0%)            | 3735 (23.2%)       |         |
| \$25,000 to \$74,999  | 5602 (39.8%)               | 905 (45.1%)            | 6507 (40.4%)       |         |
| \$75,000 to \$149,999 | 3995 (28.4%)               | 409 (20.4%)            | 4404 (27.4%)       |         |
| \$150,000 or more     | 1315 (9.3%)                | 130 (6.5%)             | 1445 (9.0%)        |         |
| Race                  |                            |                        |                    | < 0.001 |
| White                 | 9879 (70.1%)               | 1546 (77.1%)           | 11425 (71.0%)      |         |
| Black                 | 1631 (11.6%)               | 195 (9.7%)             | 1826 (11.3%)       |         |
| Hispanic              | 1408 (10.0%)               | 138 (6.9%)             | 1546 (9.6%)        |         |
| Asian                 | 764 (5.4%)                 | 53 (2.6%)              | 817 (5.1%)         |         |
| Other                 | 404 (2.9%)                 | 73 (3.6%)              | 477 (3.0%)         |         |
| Urbanicity            |                            |                        |                    | < 0.001 |
| rural                 | 2219 (15.8%)               | 406 (20.2%)            | 2625 (16.3%)       |         |
| suburban              | 7833 (55.6%)               | 1211 (60.4%)           | 9044 (56.2%)       |         |
| urban                 | 4034 (28.6%)               | 388 (19.4%)            | 4422 (27.5%)       |         |
| Region                |                            |                        |                    | < 0.001 |
| Northeast             | 2224 (15.8%)               | 262 (13.1%)            | 2486 (15.4%)       |         |
| Midwest               | 3533 (25.1%)               | 558 (27.8%)            | 4091 (25.4%)       |         |
| South                 | 5468 (38.8%)               | 819 (40.8%)            | 6287 (39.1%)       |         |
| West                  | 2861 (20.3%)               | 366 (18.3%)            | 3227 (20.1%)       |         |
| Vaccination status    |                            |                        |                    | < 0.001 |
| Unvaccinated          | 11692 (83.0%)              | 1742 (86.9%)           | 13434 (83.5%)      |         |
| Partial               | 362 (2.6%)                 | 52 (2.6%)              | 414 (2.6%)         |         |
| Complete              | 2032 (14.4%)               | 211 (10.5%)            | 2243 (13.9%)       |         |
| Predominant variant   |                            |                        |                    | < 0.001 |

|           | No Long COVID<br>(N=14086) | Long COVID<br>(N=2005) | Total<br>(N=16091) | p value |
|-----------|----------------------------|------------------------|--------------------|---------|
| alpha     | 992 (7.0%)                 | 126 (6.3%)             | 1118 (6.9%)        |         |
| ancestral | 7590 (53.9%)               | 1139 (56.8%)           | 8729 (54.2%)       |         |
| delta     | 2140 (15.2%)               | 350 (17.5%)            | 2490 (15.5%)       |         |
| epsilon   | 1386 (9.8%)                | 171 (8.5%)             | 1557 (9.7%)        |         |
| omicron   | 1978 (14.0%)               | 219 (10.9%)            | 2197 (13.7%)       |         |

**eFigure 2.** Logistic Regression Model for Development of Long COVID-19 Among Individuals Testing Positive for COVID-19 by Antigen Test or PCR, With Age by Decade, Limited to Individuals With Index Infection January 2021 or Later

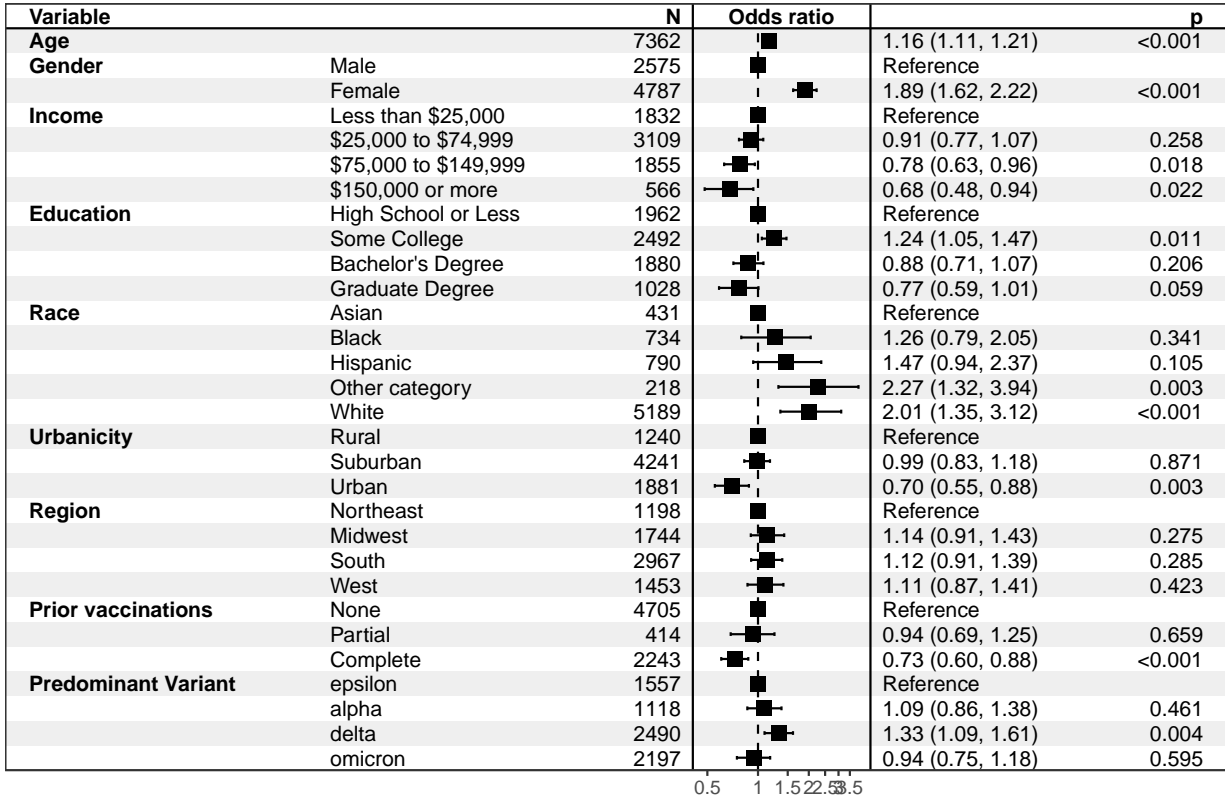

**eFigure 3.** Logistic Regression Model for Development of More Stringently Defined Long COVID-19 Among Individuals Testing Positive for COVID-19 by Antigen Test or PCR

| Variable              | N     | Odds ratio |                   | p      |
|-----------------------|-------|------------|-------------------|--------|
| <b>Age</b>            | 16091 | ■          | 1.18 (1.14, 1.21) | <0.001 |
| <b>Gender</b>         |       |            | Reference         |        |
| Male                  | 6016  | ■          |                   |        |
| Female                | 10075 | ■          | 1.83 (1.64, 2.05) | <0.001 |
| <b>Race</b>           |       |            | Reference         |        |
| Asian                 | 817   | ■          |                   |        |
| Black                 | 1546  | ■          | 1.07 (0.77, 1.51) | 0.688  |
| Hispanic              | 1826  | ■          | 1.48 (1.08, 2.05) | 0.017  |
| Other category        | 477   | ■          | 2.01 (1.38, 2.95) | <0.001 |
| White                 | 11425 | ■          | 1.74 (1.31, 2.35) | <0.001 |
| <b>Income</b>         |       |            | Reference         |        |
| Less than \$25,000    | 3735  | ■          |                   |        |
| \$25,000 to \$74,999  | 6507  | ■          | 0.91 (0.81, 1.02) | 0.106  |
| \$75,000 to \$149,999 | 4404  | ■          | 0.70 (0.61, 0.81) | <0.001 |
| \$150,000 or more     | 1445  | ■          | 0.77 (0.62, 0.95) | 0.016  |
| <b>Education</b>      |       |            | Reference         |        |
| High School or Less   | 3969  | ■          |                   |        |
| Some College          | 5309  | ■          | 1.19 (1.05, 1.34) | 0.005  |
| Bachelor's Degree     | 4100  | ■          | 0.92 (0.80, 1.06) | 0.274  |
| Graduate Degree       | 2713  | ■          | 0.70 (0.58, 0.84) | <0.001 |
| <b>Urbanicity</b>     |       |            | Reference         |        |
| Rural                 | 2625  | ■          |                   |        |
| Suburban              | 9044  | ■          | 0.96 (0.85, 1.09) | 0.536  |
| Urban                 | 4422  | ■          | 0.73 (0.62, 0.86) | <0.001 |
| <b>Region</b>         |       |            | Reference         |        |
| Northeast             | 2486  | ■          |                   |        |
| Midwest               | 4091  | ■          | 1.16 (0.99, 1.36) | 0.074  |
| South                 | 6287  | ■          | 1.14 (0.98, 1.33) | 0.087  |
| West                  | 3227  | ■          | 1.11 (0.94, 1.32) | 0.226  |

1 1.5 22.5



**eFigure 4.** Logistic Regression Model for Development of Long COVID-19 by More Stringent Definition Among Individuals Testing Positive for COVID-19 by Antigen Test or PCR, Including Predominant Variant and Vaccination Status

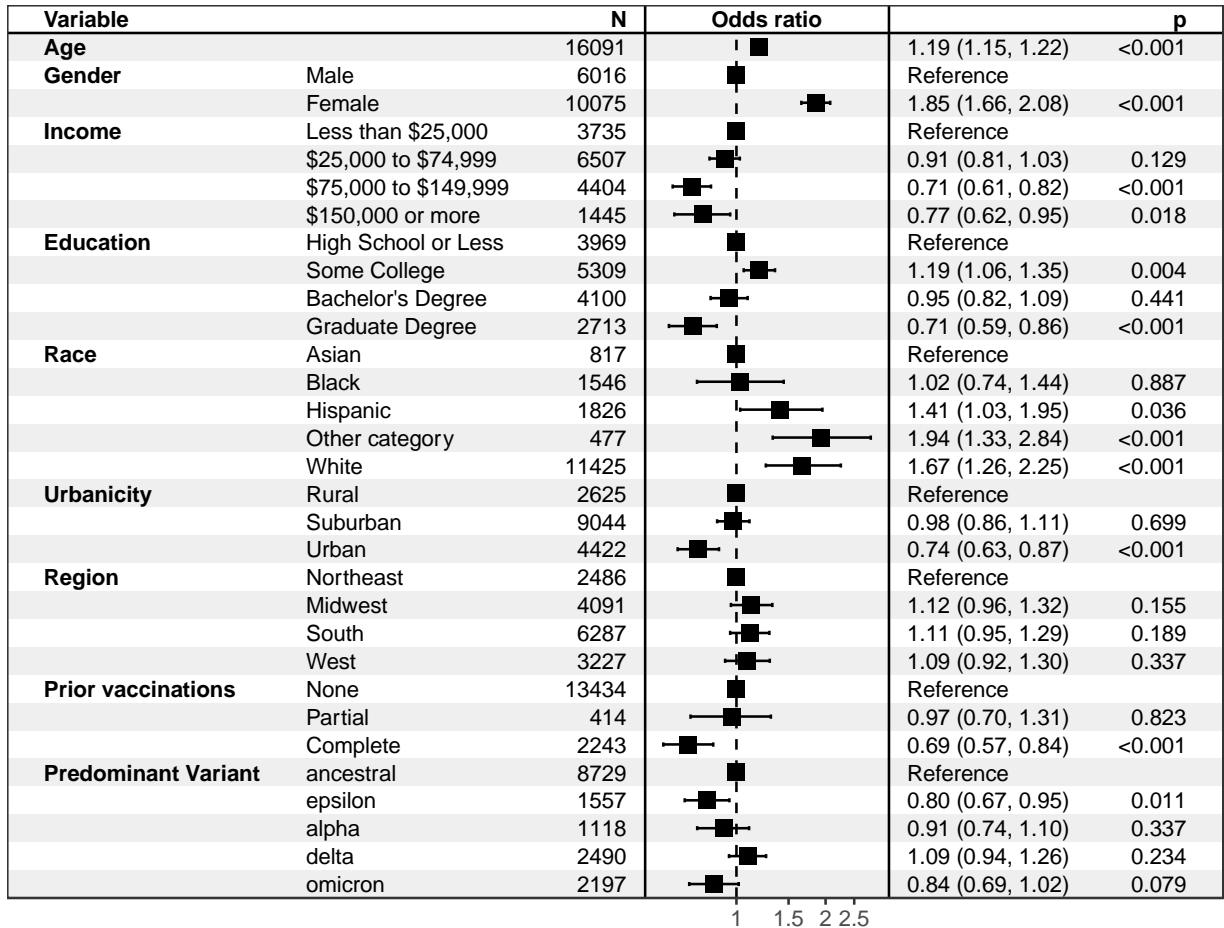

Supplement: jamanetwopen-e2238804-s001.pdf [file jamanetwopen-e2238804-s001.pdf]
